# Supplementary material for: Mitochondrial transfer alters cell fate by remodeling metabolic processes to regulate bone homeostasis
Source: Research Square preprint supplement (doi:10.21203/rs.3.rs-1535811/v1), 2022-04-25
Supplement: Supplementary file 1 [file 55a81958d3534e3008c314c0.docx]

**Supplementary Table**

**Supplementary Table 1. Primer Sequences**

| Gene | Forward Sequence（5’-3’） | Reverse Sequence（5’-3’） |
| --- | --- | --- |
| *Inos* | GTTCTCAGCCCAACAATACAAGA | GTGGACGGGTCGATGTCAC |
| *IL-1β* | GCAACTGTTCCTGAACTCAACT | ATCTTTTGGGGTCCGTCAACT  ATCTTTTGGGGTCCGTCAACT |
| *TNF-a* | TGTCTCAGCCTCTTCTCATT | TGATCTGAGTGTGAGGGTCT |
| *CD80* | ACCCCCAACATAACTGAGTCT | TTCCAACCAAGAGAAGCGAGG |
| *IL-10* | GCTCTTACTGACTGGCATGAG | CGCAGCTCTAGGAGCATGTC |
| *IL-6* | ATAGTCCTTCCTACCCCAATTTCC | GATGAATTGGATGGTCTTGGTCC |
| *Hif1-α* | ACCTTCATCGGAAACTCCAAAG | ACTGTTAGGCTCAGGTGAACT |
| *Hk2* | TGATCGCCTGCTTATTCACGG | AACCGCCTAGAAATCTCCAGA |
| *Slc2a1* | CAGTTCGGCTATAACACTGGTG | GCCCCCGACAGAGAAGATG |
| *Ldha* | TGTCTCCAGCAAAGACTACTGT | GACTGTACTTGACAATGTTGGGA |
| *Tpi1* | CCAGGAAGTTCTTCGTTGGGG | CAAAGTCGATGTAAGCGGTGG |
| *Aldoc* | AGAAGGAGTTGTCGGATATTGCT | TTCTCCACCCCAATTTGGCTC |
| *Col1* | TGGCAAAGACGGACTCAAC | GGCAGGAAGCTGAAGTCATAA |
| *Alp* | CCAACTCTTTTGTGCCAGAGA | GGCTACATTGGTGTTGAGCTTTT |
| *Runx2* | ATTACAGATCCCAGGCAGGCA | CAGAAGTCAGAGGTGGCAGTGT |
| *Osx* | CAACCTGCTAGAGATCTGAG | TGCAATAGGAGAGAGCGA |
| *β-actin* | CATCCGTAAAGACCTCTATGCCAAC | ATGGAGCCACCGATCCACA |
